# Supplementary material for: Post-stroke cognitive impairment and brain hemorrhage are augmented in hypertensive mice
Source: PubMed Central journal article supplement (PMC11572097; doi:10.1177/0271678x241262127), 2024-06-17
Supplement: sj-pdf-1-jcb-10.1177_0271678X241262127.pdf [file sj-pdf-1-jcb-10.1177_0271678X241262127.pdf]

## SUPPLEMENTARY INFORMATION

### Post-Stroke Cognitive Impairment and Brain Hemorrhage are Augmented in Hypertensive Mice

David E. Wong Zhang<sup>1,2</sup>, Tayla A. Gibson Hughes<sup>1,2</sup>, Hericka B. Figueiredo Galvao<sup>1,2</sup>, Cecilia Lo<sup>2</sup>, Quynh Nhu Dinh<sup>1,2</sup>, Shenpeng R. Zhang<sup>1,2</sup>, Hyun Ah Kim<sup>1,2</sup>, Sharmalee Selvaraji<sup>3-5</sup>, Andrew N. Clarkson<sup>2</sup>, Thiruma V. Arumugam<sup>1,2</sup>, Grant Drummond<sup>1,2</sup>, Christopher G. Sobey<sup>1,2</sup> and T. Michael De Silva<sup>1,2</sup>

<sup>1</sup>Centre for Cardiovascular Biology and Disease Research and La Trobe Institute for Molecular Sciences (LIMS), La Trobe University, Victoria, Australia;

<sup>2</sup>Department of Microbiology, Anatomy, Physiology & Pharmacology, School of Agriculture, Biomedicine, Environment, La Trobe University, Victoria, Australia;

<sup>3</sup>Department of Physiology, Yong Loo Lin School Medicine, National University of Singapore, Singapore, Singapore

<sup>4</sup>Memory Aging and Cognition Centre, Department of Pharmacology, Yong Loo Lin School of Medicine, National University of Singapore, Singapore, Singapore

<sup>5</sup>NUS Graduate School for Integrative Sciences and Engineering, National University of Singapore, Singapore, Singapore

**Corresponding author:**

T. Michael De Silva, PhD

Centre for Cardiovascular Biology and Disease Research and

La Trobe Institute for Molecular Sciences (LIMS)

Department of Microbiology, Anatomy, Physiology & Pharmacology

School of Agriculture, Biomedicine, Environment

La Trobe University

Bundoora, Victoria 3086, Australia

e-Mail: [t.desilva@latrobe.edu.au](mailto:t.desilva@latrobe.edu.au)

Phone: +61-3-94796876

**Table 1. Experimental groups**

| Groups      | 0.7 mg/kg/d; 14 d protocol | 0.28 mg/kg/d; 28 d protocol |
|-------------|----------------------------|-----------------------------|
| NT + Sham   | N=10                       | N=12                        |
| NT + Stroke | N=10                       | N=9                         |
| HT + Sham   | N=11                       | N=12                        |
| HT + Stroke | N=12                       | N=13                        |

**Supplementary Table 1. Summary of experimental groups.** Hypertension (HT; angiotensin II 0.7mg/kg/d or 0.28 mg/kg/d) or normotension (NT) group in combination with either sham or stroke surgery.

**Table 2. Primers used for Real-Time PCR**

| Gene            | Assay ID      |
|-----------------|---------------|
| <i>Arg1</i>     | Mm00475988_m1 |
| <i>Cd14</i>     | Mm00438094_g1 |
| <i>Clcf1</i>    | Mm01236492_m1 |
| <i>EMP1</i>     | Mm00515678_m1 |
| <i>FAM19A3</i>  | Mm01305353_m1 |
| <i>Gbp2</i>     | Mm00494575_m1 |
| <i>Il4</i>      | Mm00445259_m1 |
| <i>iNOS</i>     | Mm00440502_m1 |
| <i>Psmb8</i>    | Mm01278979_m1 |
| <i>Serping1</i> | Mm00437835_m1 |
| <i>Srgn</i>     | Mm01169070_m1 |
| <i>Stat3</i>    | Mm01219775_m1 |
| <i>Tgm1</i>     | Mm00498375_m1 |

**Supplementary Table 2. Primers used for real time PCR.** Assay ID's for genes measured by real time PCR.

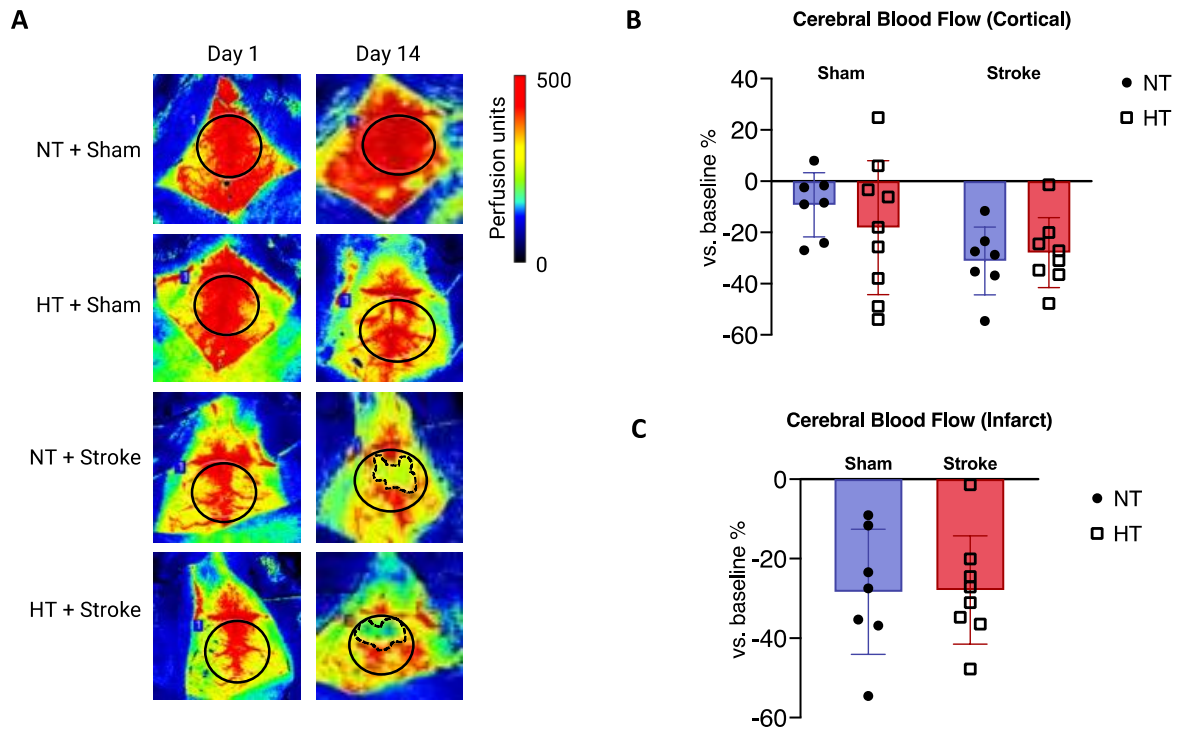

**Supplementary Figure 1. Cerebral blood flow in mice from the 14-day protocol. (A)** Representative laser speckle contrast images of cerebral blood flow (CBF) of each group at baseline (day 0) and prior to euthanasia (day 14). Cortical CBF was measured in a 20 mm<sup>2</sup> area shown by the solid line and summarised in **(B)**. The area of perfusion deficit (infarct area) is shown by the dashed line and summarised in **(C)**. Cerebral blood flow at day 14 is compared to the same area measured at day 0. Data is presented as mean  $\pm$  SD, n=8-9/group. Two-way ANOVA.

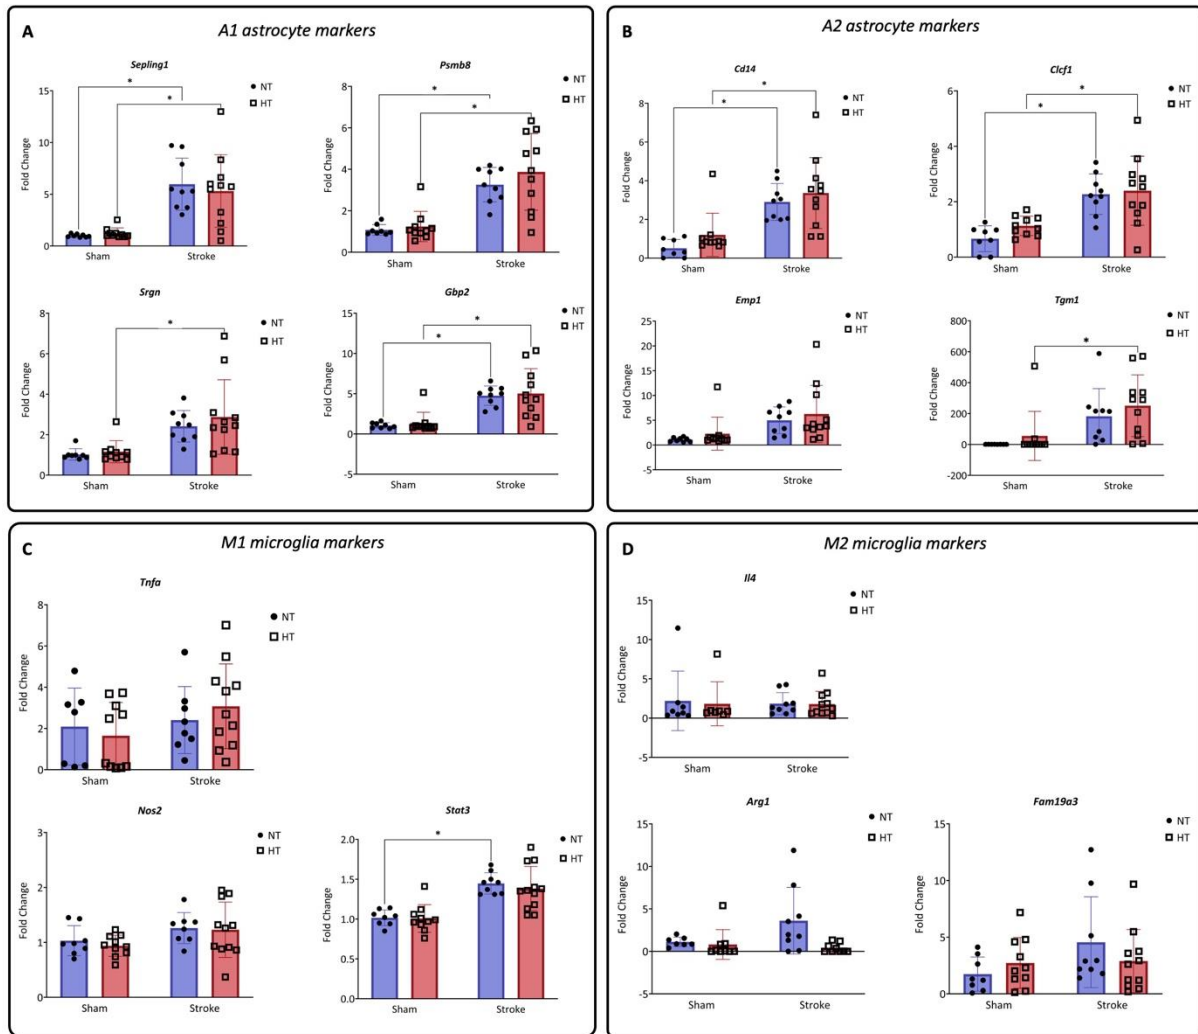

**Supplementary Figure 2. Expression of astrocytic and microglial markers in the brain.** Classical markers of the **(A)** proinflammatory A1 astrocytes and **(B)** anti-inflammatory A2 astrocytes; **(C)** proinflammatory M1 microglia and **(D)** anti-inflammatory M2 microglia. Data is presented as mean  $\pm$  SD, n=6/group. \* Indicates  $P < 0.05$ , two-way ANOVA with Tukey's multiple comparisons test.
